# Supplementary material
Source: PubMed Central journal article supplement (PMC4153368)
Supplement: NIHMS619066-supplement-Authors_Bio.pdf [file NIHMS619066-supplement-Authors_Bio.pdf]

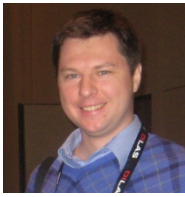

**Dmitri A. Tsyboulski** is a Senior Scientist at TomoWave Laboratories, Inc. (Houston, TX). He obtained his Ph.D. in Chemistry from Rice University, Houston, TX in 2006. His research expertise includes design of spectroscopic and imaging systems, nanoparticle characterization, and molecular spectroscopy.

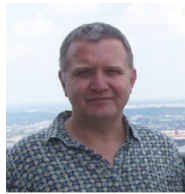

**Anton Liopo** has a Ph.D. in Physiology. His expertise appears in fields of biochemistry, neurochemistry, neuromorphology, nanobiotechnology and physiology in cells and animals. Anton's research has been focused on investigation of nanoparticles – cell interaction, toxicity, biocompatibility, and biodistribution of nanoparticles in preclinical research.

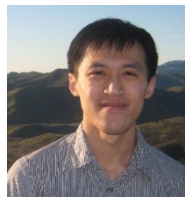

**Richard Su** is a Scientist at TomoWave Laboratories. He graduated from the University of Texas in Biomedical Engineering and is currently pursuing his Ph.D. at the University of Houston. His research involves visualization and detection of breast and prostate tumors, creation of phantoms to mimic optical and ultrasound properties of tissues, and methods of monitoring temperature changes with optoacoustics. His expertise covers imaging, with 2D and 3D optoacoustic tomography.

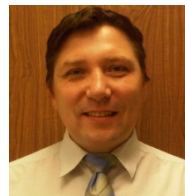

**Sergey A. Ermilov** is a Vice President for R&D at TomoWave Laboratories. He received Ph.D. in Bioengineering from Rice University. He is responsible for strategic planning of R&D projects at TomoWave. His scientific expertise in the field of biomedical optoacoustics includes development of laser optoacoustic and ultrasonic imaging systems, computer modeling, signal processing, and image reconstruction.

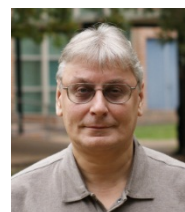

**Sergei M. Bachilo** Sergei M. Bachilo is a research scientist at Rice University. He has a Ph.D. degree in Physics and Mathematics from Belorussian Academy of Sciences. He is a well-known expert in spectroscopy, most recently in areas related to single-walled carbon nanotubes (SWCNT). He conducts basic and applied studies on SWCNT and related nanosystems.

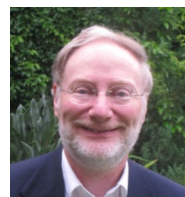

**R. Bruce Weisman** received a Ph.D. in Chemistry from the University of Chicago and conducted postdoctoral research at the University of Pennsylvania. In 1979 he joined the faculty of Rice University, where he is currently Professor of Chemistry. Prof. Weisman is a pioneer in the fluorescence spectroscopy of carbon nanotubes. He is an elected Fellow of the Electrochemical Society and the American Physical Society, and is currently Chair of the Nanocarbons Division of the Electrochemical Society.

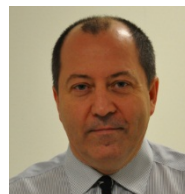

**Alexander A. Oraevsky** received Ph.D. degree in laser spectroscopy and biophysics from the Institute of Spectroscopy, Russian Academy of Sciences. Currently he is Chief Technology Officer at TomoWave Laboratories and adjunct Professor at the University of Houston. He is the principal inventor of the opto-acoustic imaging system and method and an author of 7 book chapters, 14 patents and more than 200 scientific papers developing novel technologies for biomedical imaging, sensing and monitoring.
